# Supplementary material
Source: PubMed Central journal article supplement (PMC3140696)
Supplement: NIHMS104815-supplement-1.pdf [file NIHMS104815-supplement-1.pdf]

**SUPPLEMENTARY TABLE 1. Plasmids used in this study**

---

| Plasmid      | Precursor | Description                                                                 | Source                 |
|--------------|-----------|-----------------------------------------------------------------------------|------------------------|
| pC3286       | p4437     | integrating <i>URA3 P<sub>CUP1</sub>-UBI-R-tif51a-td</i> plasmid            | This study             |
| pC3287       | YCplac111 | sc <i>LEU2 TIF51A</i> plasmid                                               | This study             |
| pC3288       | YCplac33  | sc <i>URA3 TIF51A</i> plasmid                                               | This study             |
| pC3289       | YEplac181 | hc <i>LEU2 TIF51A</i> plasmid                                               | This study             |
| pC3290       | pC3289    | hc <i>LEU2</i> C-terminal FLAG-tagged <i>TIF51A</i> plasmid                 | This study             |
| pC3291       | pC3290    | hc <i>LEU2</i> C-terminal FLAG-tagged <i>tif51a</i> <sup>K51R</sup> plasmid | This study             |
| pC3293       | pC3292    | sc <i>LEU2 tif51a-D63V</i> plasmid                                          | This study             |
| pC3294       | pC3292    | sc <i>LEU2 tif51a-S149P</i> plasmid                                         | This study             |
| pYDL-control |           |                                                                             | Dinman JD <sup>1</sup> |
| pYDL-LA      |           |                                                                             | Dinman JD <sup>1</sup> |
| pYDL-Ty1     |           |                                                                             | Dinman JD <sup>1</sup> |
| pYDL-LA0     |           |                                                                             | Dinman JD <sup>1</sup> |

---

Single copy (sc) or high copy (hc) number plasmid

<sup>1</sup> Harger, J. W. & Dinman, J. D. An *in vivo* dual-luciferase assay system for studying translational recoding in the yeast *Saccharomyces cerevisiae*. *RNA* **9**, 1019-1024 (2003).

**SUPPLEMENTARY TABLE 2. *S. cerevisiae* strains used in this study**

| Strain | Precursor | Genotype                                                                                                                                                                                                                                             | Source        |
|--------|-----------|------------------------------------------------------------------------------------------------------------------------------------------------------------------------------------------------------------------------------------------------------|---------------|
| H2557  |           | <i>MAT<math>\alpha</math> trp1-63 ura3-52 leu2-3 leu2-112 GAL2+ gcn2<math>\Delta</math></i>                                                                                                                                                          | Hinnebusch AG |
| J691   | H2557     | <i>MAT<math>\alpha</math> trp1-63 ura3-52 leu2-3 leu2-112 GAL2+ gcn2<math>\Delta</math> tif51b::KANMX4</i>                                                                                                                                           | This study    |
| J692   | J691      | <i>MAT<math>\alpha</math> trp1-63 ura3-52 leu2-3 leu2-112 GAL2+ gcn2<math>\Delta</math> tif51b::NAT</i>                                                                                                                                              | This study    |
| J693   | J692      | <i>MAT<math>\alpha/a</math> trp1-63/trp1-63 ura3-52/ura3-52 leu2-3/leu2-3 leu2-112/leu2-112 GAL2<sup>+</sup>/GAL2<sup>+</sup> gcn2<math>\Delta</math>/gcn2<math>\Delta</math> tif51b::NAT/tif51b::NAT</i>                                            | This study    |
| J694   | J693      | <i>MAT<math>\alpha/a</math> trp1-63/trp1-63 ura3-52/ura3-52 leu2-3/leu2-3 leu2-112/leu2-112 GAL2<sup>+</sup>/GAL2<sup>+</sup> gcn2<math>\Delta</math>/gcn2<math>\Delta</math> tif51b::NAT/tif51b::NAT pC3288[TIF51A, URA3]</i>                       | This study    |
| J695   | J694      | <i>MAT<math>\alpha/a</math> trp1-63/trp1-63 ura3-52/ura3-52 leu2-3/leu2-3 leu2-112/leu2-112 GAL2<sup>+</sup>/GAL2<sup>+</sup> gcn2<math>\Delta</math>/gcn2<math>\Delta</math> tif51b::NAT/tif51b::NAT tif51a::KANMX4/TIF51A pC3288[TIF51A, URA3]</i> | This study    |
| J696   | J695      | <i>MAT<math>\alpha</math> trp1-63 ura3-52 leu2-3 leu2-112 GAL2+ gcn2<math>\Delta</math> tif51b::NAT tif51a::KANMX4 pC3288[TIF51A, URA3]</i>                                                                                                          | This study    |
| J697   | J696      | <i>MAT<math>\alpha</math> trp1-63 ura3-52 leu2-3 leu2-112 GAL2+ gcn2<math>\Delta</math> tif51b::NAT tif51a::KANMX4 pC3287[TIF51A, LEU2]</i>                                                                                                          | This study    |
| J698   | J696      | <i>MAT<math>\alpha</math> trp1-63 ura3-52 leu2-3 leu2-112 GAL2+ gcn2<math>\Delta</math> tif51b::NAT tif51a::KANMX4 pC3293[tif51a-D63V, LEU2]</i>                                                                                                     | This study    |
| J699   | J696      | <i>MAT<math>\alpha</math> trp1-63 ura3-52 leu2-3 leu2-112 GAL2+ gcn2<math>\Delta</math> tif51b::NAT tif51a::KANMX4 pC3294[tif51a-S149P, LEU2]</i>                                                                                                    | This study    |
| J700   | H2557     | <i>MAT<math>\alpha</math> trp1-63 ura3-52 leu2-3 leu2-112 GAL2+ gcn2<math>\Delta</math> ubr1::P<sub>GAL1</sub>-myc-UBR1-TRP1</i>                                                                                                                     | This study    |
| J701   | J700      | <i>MAT<math>\alpha</math> trp1-63 ura3-52 leu2-3 leu2-112 GAL2+ gcn2<math>\Delta</math> ubr1::P<sub>GAL1</sub>-myc-UBR1-TRP1 P<sub>CUP1</sub>-UBI-R-tif51a-td::URA3::tif51a</i>                                                                      | This study    |

|          |      |                                                                                                                                                                                                                                                              |                            |
|----------|------|--------------------------------------------------------------------------------------------------------------------------------------------------------------------------------------------------------------------------------------------------------------|----------------------------|
| J702     | J701 | <i>MAT<math>\alpha</math> trp1-63 ura3-52 leu2-3 leu2-112 GAL2+ gcn2<math>\Delta</math></i><br><i>ubr1:: P<sub>GAL1</sub>-myc -UBR1-TRP1 P<sub>CUP1</sub>-UBI-R-tif51a-td::URA3::tif51a</i><br><i>tif51b::KANMX4</i>                                         | This study                 |
| J703     | J702 | <i>MAT<math>\alpha</math> trp1-63 ura3-52 leu2-3 leu2-112 GAL2+ gcn2<math>\Delta</math></i><br><i>ubr1:: P<sub>GAL1</sub>-myc-UBR1-TRP1 P<sub>CUP1</sub>-UBI-R-tif51a-td::URA3::tif51a</i><br><i>tif51b::KANMX4 pC3290[TIF51A-FLAG, LEU2]</i>                | This study                 |
| J704     | J702 | <i>MAT<math>\alpha</math> trp1-63 ura3-52 leu2-3 leu2-112 GAL2+ gcn2<math>\Delta</math></i><br><i>ubr1:: P<sub>GAL1</sub>-myc-UBR1-TRP1 P<sub>CUP1</sub>-UBI-R-tif51a-td::URA3::tif51a</i><br><i>tif51b::KANMX4 pC3291[tif51a<sup>K51R</sup>-FLAG, LEU2]</i> | This study                 |
| J713     | J700 | <i>MAT<math>\alpha</math> trp1-63 ura3-52 leu2-3 leu2-112 GAL2+ gcn2<math>\Delta</math></i><br><i>ubr1::P<sub>GAL1</sub>-myc-UBR1-TRP1 YCplac33</i>                                                                                                          | This study                 |
| J714     | J713 | <i>MAT<math>\alpha</math> trp1-63 ura3-52 leu2-3 leu2-112 GAL2+ gcn2<math>\Delta</math></i><br><i>ubr1::P<sub>GAL1</sub>-myc-UBR1-TRP1 tif51b::KANMX4 YCplac33</i>                                                                                           | This study                 |
| YAJ2     |      | <i>MAT<math>\alpha</math> trp1<math>\Delta</math> ura3-52 leu2-3,-112 gcn2<math>\Delta</math>::hisG</i><br><i>P<sub>GAL</sub>-myc-UBR1::TRP1::ubr1</i>                                                                                                       | Hinnebusch AG <sup>1</sup> |
| YAJ22    |      | <i>MAT<math>\alpha</math> trp1<math>\Delta</math> ura3-52 leu2-3,-112 gcn2<math>\Delta</math>::hisG</i><br><i>P<sub>GAL</sub>-myc-UBR1::TRP1::ubr1 P<sub>CUP1</sub>-UB I-R-HA- tif32<sup>td</sup>::URA3::tif32</i>                                           | Hinnebusch AG <sup>1</sup> |
| SL797-2C |      | <i>MAT<math>\alpha</math> met8-1 leu2-1 aro7-1 trp1-1 his5-2 lys2-1 ura3-52 sup35-4</i>                                                                                                                                                                      | Liebman SW <sup>2</sup>    |

<sup>1</sup> Jivotovskaya, A. V., Valasek, L., Hinnebusch, A. G. & Nielsen, K. H. Eukaryotic translation initiation factor 3 (eIF3) and eIF2 can promote mRNA binding to 40S subunits independently of eIF4G in yeast. *Mol Cell Biol* **26**, 1355-1372 (2006).

<sup>2</sup> All-Robyn, J. A., Kelley-Geraghty, D., Griffin, E., Brown, N. & Liebman, S. W. Isolation of omnipotent suppressors in an [*eta*<sup>+</sup>] yeast strain. *Genetics* **124**, 505-514 (1990).

**a**

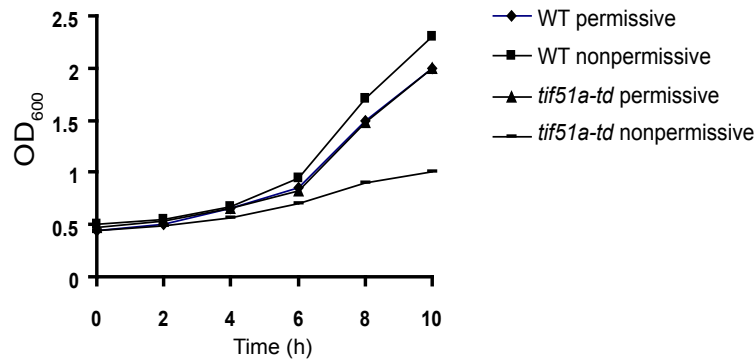

**b**

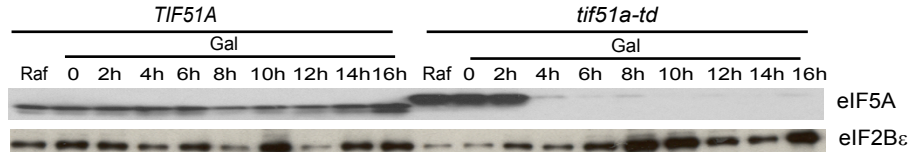

**Supplementary Figure 1: Impaired growth and rapid depletion of eIF5A in *tif51a-td* strain under non-permissive conditions.** **a**, Isogenic WT (J714) and *tif51a-td* mutant (J702) strains were grown in SC medium containing 2% raffinose as a carbon source and 100  $\mu$ M copper sulphate (SC<sub>Raf</sub> + Cu<sup>2+</sup>; permissive condition) to OD<sub>600</sub> ~ 1.0, washed at room temperature to remove Cu<sup>2+</sup>, split in halves, and incubated under permissive or non-permissive conditions (SC<sub>Gal</sub>; SC containing 2% galactose lacking copper). **b**, Western analysis of eIF5A. Strains described for panel **b** were cultured under the same conditions as for panel **a**, and WCEs were prepared and subjected to western analysis using antibodies against the indicated proteins. Immune complexes were visualized by chemiluminescence.

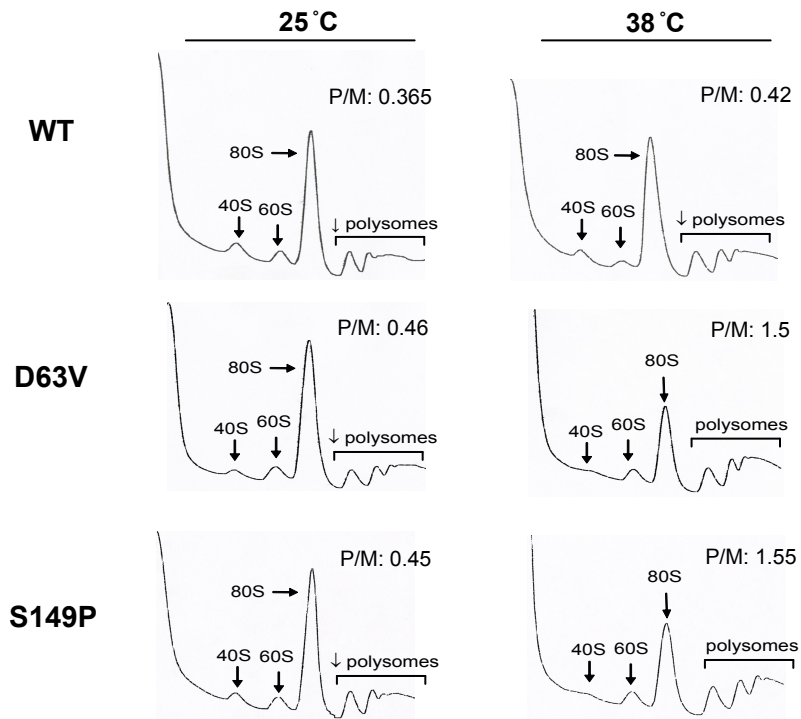

**Supplementary Figure 2: Retention of polysomes in *tif51a-D63V* and *tif51a-S149P* mutant strains at restrictive temperatures.** Isogenic WT (J697), *tif51a-D63V* (D63V; J698), and *tif51a-S149P* (S149P; J699) strains were grown to mid-log phase at 25 °C in SC medium, pelleted, and diluted to  $A_{600}$  of ~0.5 with either 25 °C or pre-warmed 38 °C media. Cultures were then incubated for 2 h at 25 or 38 °C, respectively, and WCEs were prepared and separated on 4.5% to 45% sucrose gradients by centrifugation at 39,000 rpm for 2.5 h. Gradients were fractionated while scanning at 254 nm to visualize the indicated ribosomal species. Polysome to monosome (P/M) ratios were calculated by comparing the areas under the 80S and polysome peaks. ↓polysomes indicates reduced amount of polysomes.

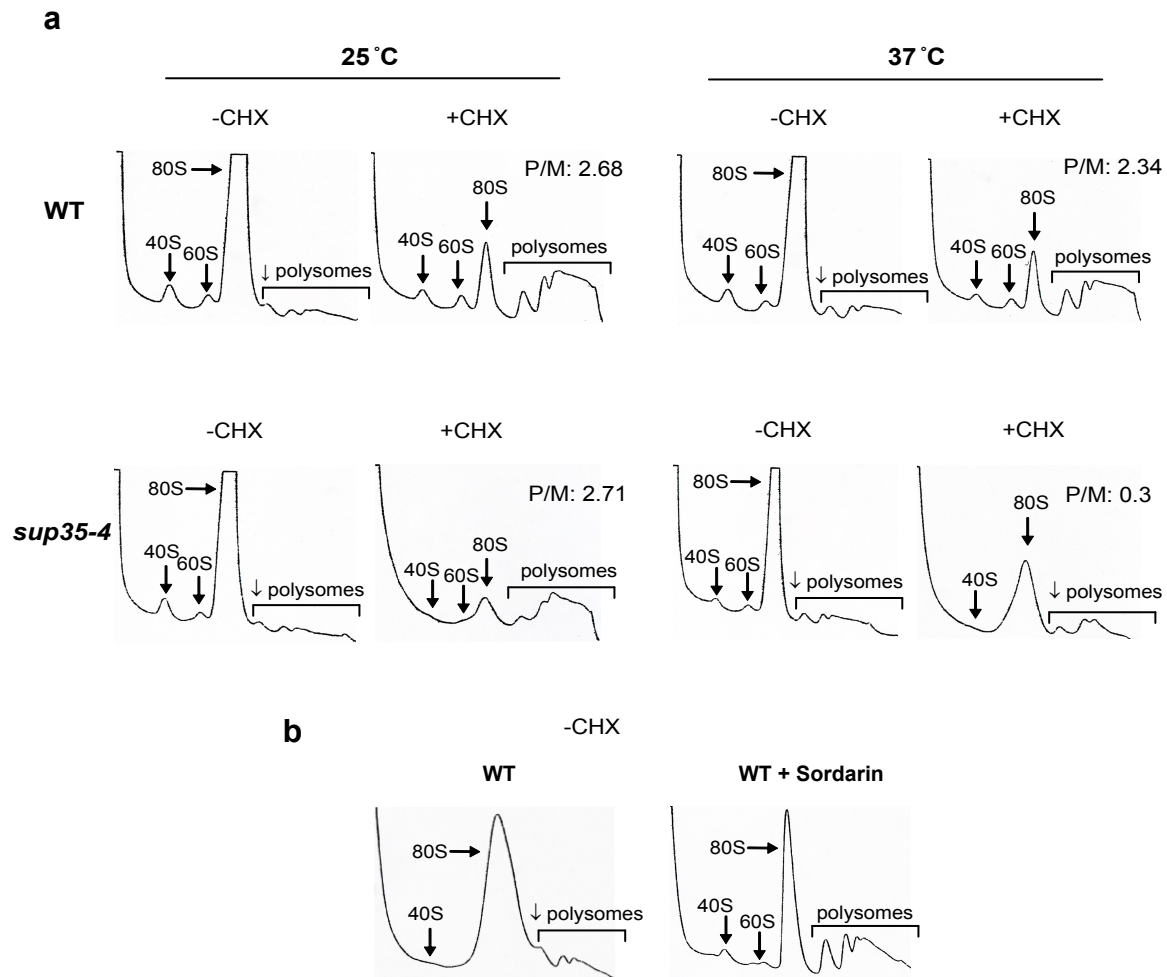

**Supplementary Figure 3: Polysome analysis in termination factor eRF3 (*sup35-4*) mutant strain and in sordarin-treated WT strain. a,** The *sup35-4* temperature-sensitive mutant strain SL797-2C transformed with either an empty vector (*sup35-4*) or a *SUP35* plasmid (WT) was grown to mid-log phase at 25 °C in YEPD medium, pelleted, and diluted to  $A_{600}$  of ~0.5 with either 25 °C or pre-warmed 37 °C media. Cultures were then incubated for 2 h at 25 or 37 °C and cells were either untreated or treated with 50 µg/ml CHX for 5 min before harvesting. WCE preparation, sucrose gradient analysis, and P/M ratio calculation were performed as described for supplementary Figure 2. **b,** The WT strain J714 was grown in  $SC_{Gal-Cu^{2+}}$  for 14 h with the final 5h in the absence or presence of 2 µg/ml of sordarin. WCE preparation, sucrose gradient analysis, and P/M ratio calculation were performed as described for supplementary Figure 2. ↓polysomes indicates reduced amount of polysomes.

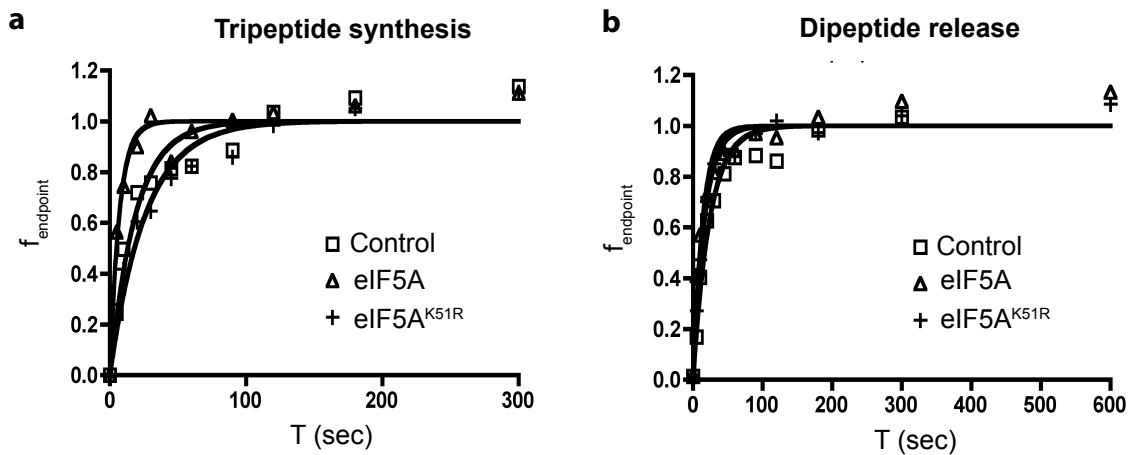

**Supplementary Figure 4: Representative fits from *in vitro* elongation and termination experiments.** Reconstituted elongation and termination assays were carried out in triplicate as described in the text and Methods. As previously mentioned, single-exponential curves were fitted to the data to obtain rate constants and endpoints. Representative curves are shown for (a) an elongation assay and (b) a release assay.  $f_{\text{endpoint}}$  is the ratio of peptide at any given data point to the endpoint value generated in the curve fitting process. Note that the time (x) axis in (b) is twice as long as in (a).

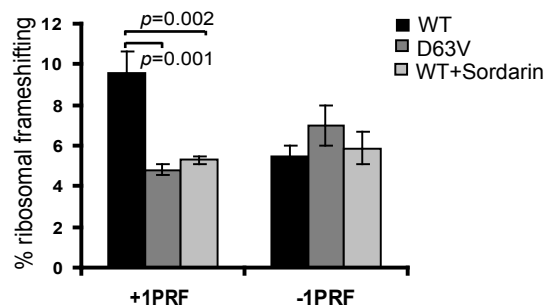

**Supplementary Figure 5: eEF2 inhibitor sordarin and *tif51a*-D63V mutation decrease +1 ribosomal frameshifting at 38 °C.** Dual-luciferase reporter plasmids containing firefly (F) and *Renilla* (R) luciferase coding regions separated by the +1 programmed ribosomal frameshift (PRF) signal from the yeast *Ty1* retrotransposon or the -1 PRF signal from the yeast L-A virus<sup>1</sup>, or the relevant 0-frame control were introduced into WT and *tif51a*-D63V mutant strains. Where indicated, cultures contained 200 ng/ml sordarin. PRF efficiencies (%) were calculated by dividing the ratio of F to R luciferase obtained with the reporter versus the 0-frame control plasmid. Results are the average of at least three independent experiments; *P*-values for -1 PRF were 0.08 (WT vs. D63V) and 0.54 (WT +/- sordarin).

<sup>1</sup> Harger, J. W. & Dinman, J. D. An *in vivo* dual-luciferase assay system for studying translational recoding in the yeast *Saccharomyces cerevisiae*. *RNA* **9**, 1019-1024 (2003).
